# Supplementary material
Source: PubMed Central journal article supplement (PMC3143565)

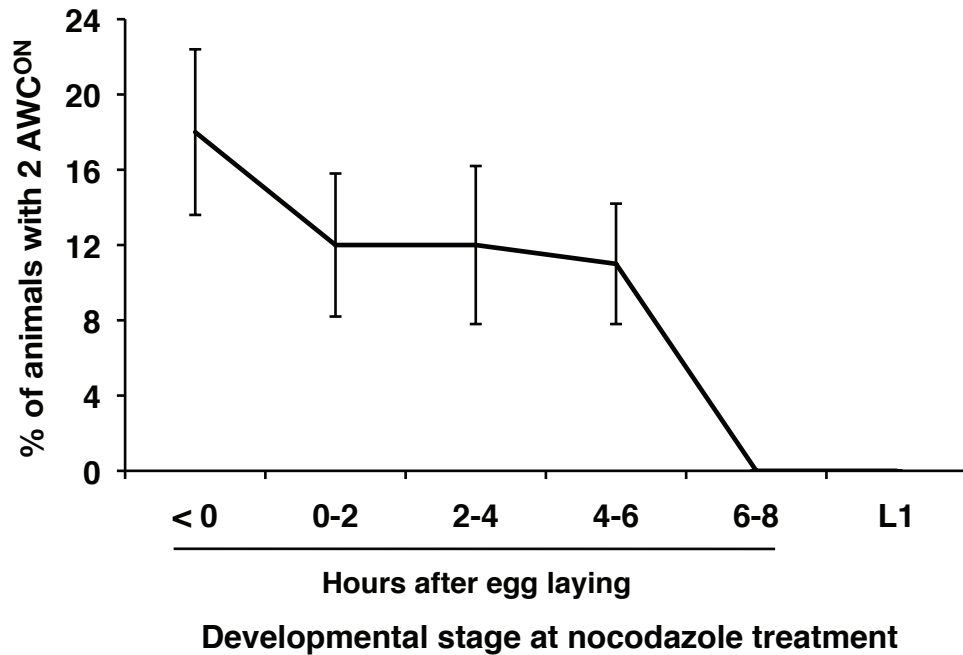

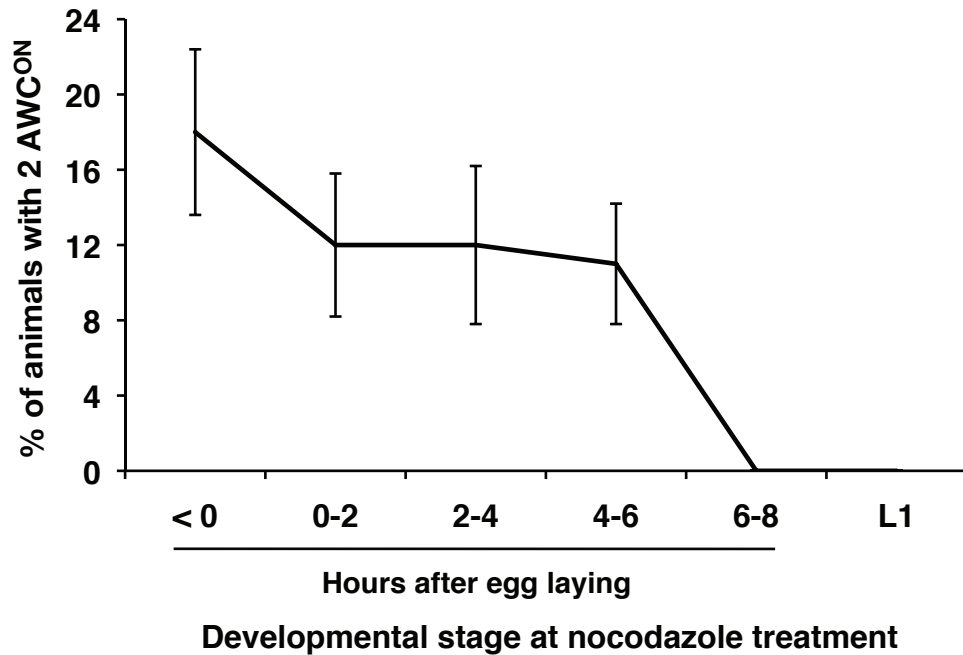



Supplement: supp_dev.069740_DEV069740FigS1.pdf [file supp_dev.069740_DEV069740FigS1.pdf]
